# Supplementary material for: Theoretical study on the reaction mechanism of Si2Cl6 and HCl catalyzed by amine catalysts
Source: Royal Society of Chemistry journal article supplement (doi:10.1039/d2nj02834d), 2022-01-01
Supplement: d2nj02834d1.pdf [file d2nj02834d1.pdf]

## Supporting information

### Theoretical study on the reaction mechanism of $\text{Si}_2\text{Cl}_6$ and HCl catalyzed by amine catalysts

Na Zhang,<sup>a</sup> Qing Zheng,<sup>a</sup> Yi Wang,<sup>a</sup> Danqi Wang,<sup>a</sup> Wencai Peng,<sup>a,b\*</sup> Jianshu Zhang,<sup>a,b\*</sup> Jinli Zhang<sup>a,c</sup> and  
Jichang Liu<sup>a,d</sup>

<sup>a</sup> School of Chemistry and Chemical Engineering, Shihezi University, Shihezi 832003, Xinjiang,  
China.

<sup>b</sup> Key Laboratory for Green Processing of Chemical Engineering of Xinjiang Bingtuan, Shihezi  
832003, Xinjiang, China.

<sup>c</sup> School of Chemical Engineering, Tianjin University, Tianjin 300350, Tianjin, China.

<sup>d</sup> State Key Laboratory of Chemical Engineering, East China University of Science and Technology,  
Shanghai 200237, China.

Table S1. Experimental and calculated values of reaction Gibbs free energy change.

|                                | Experiment <sup>1-4</sup> | Calculation |
|--------------------------------|---------------------------|-------------|
| $\Delta_r G^\ddagger$ (kJ/mol) | -79.69                    | -78.88      |

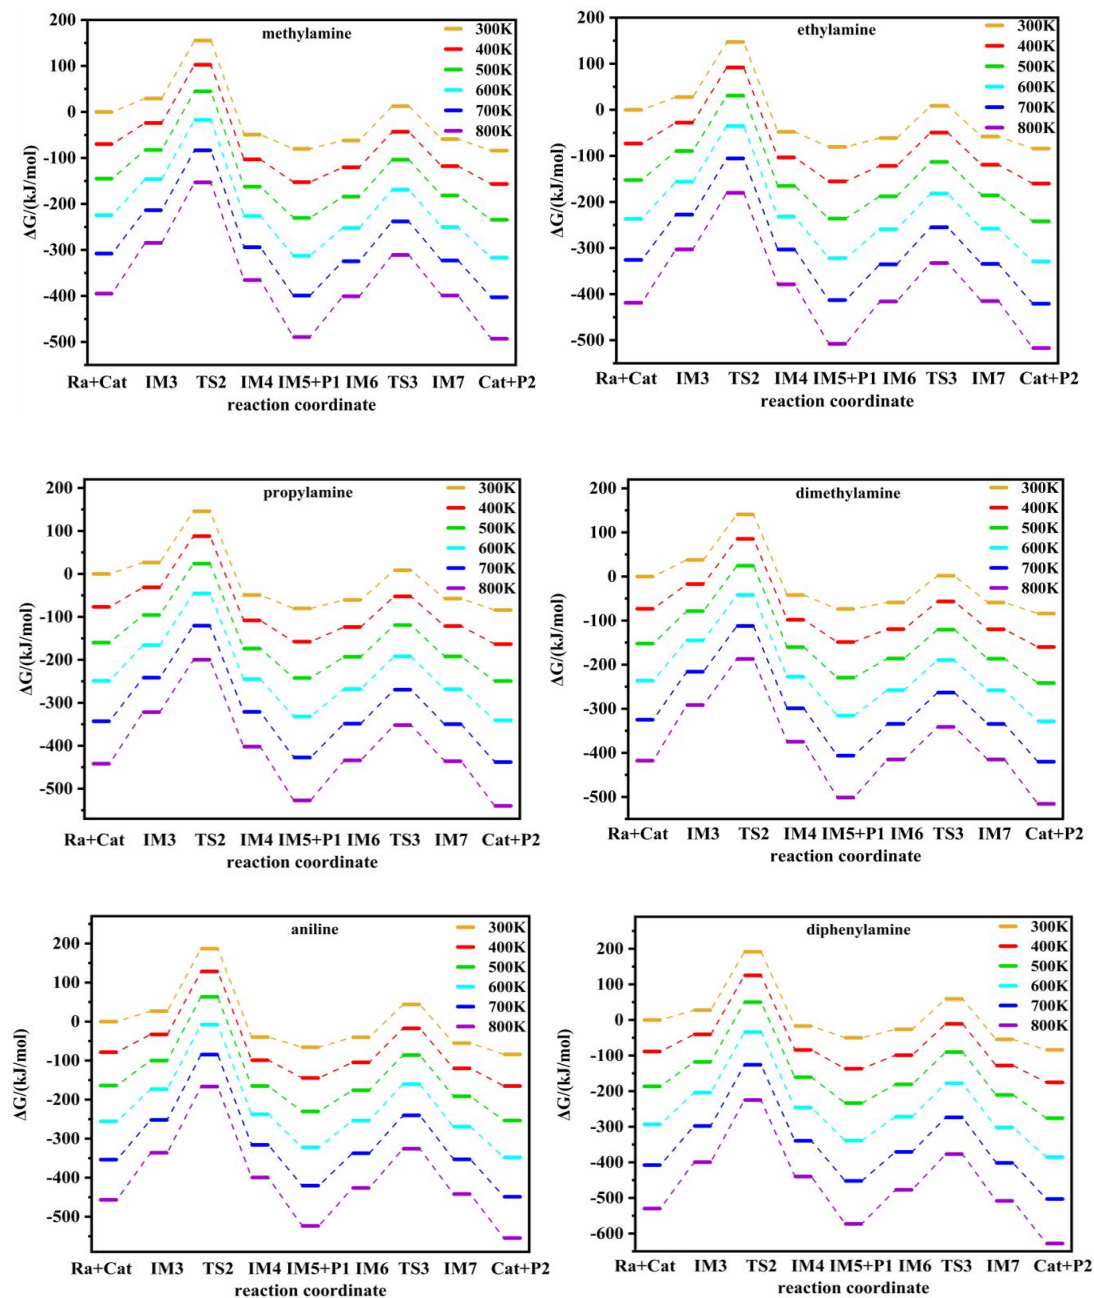

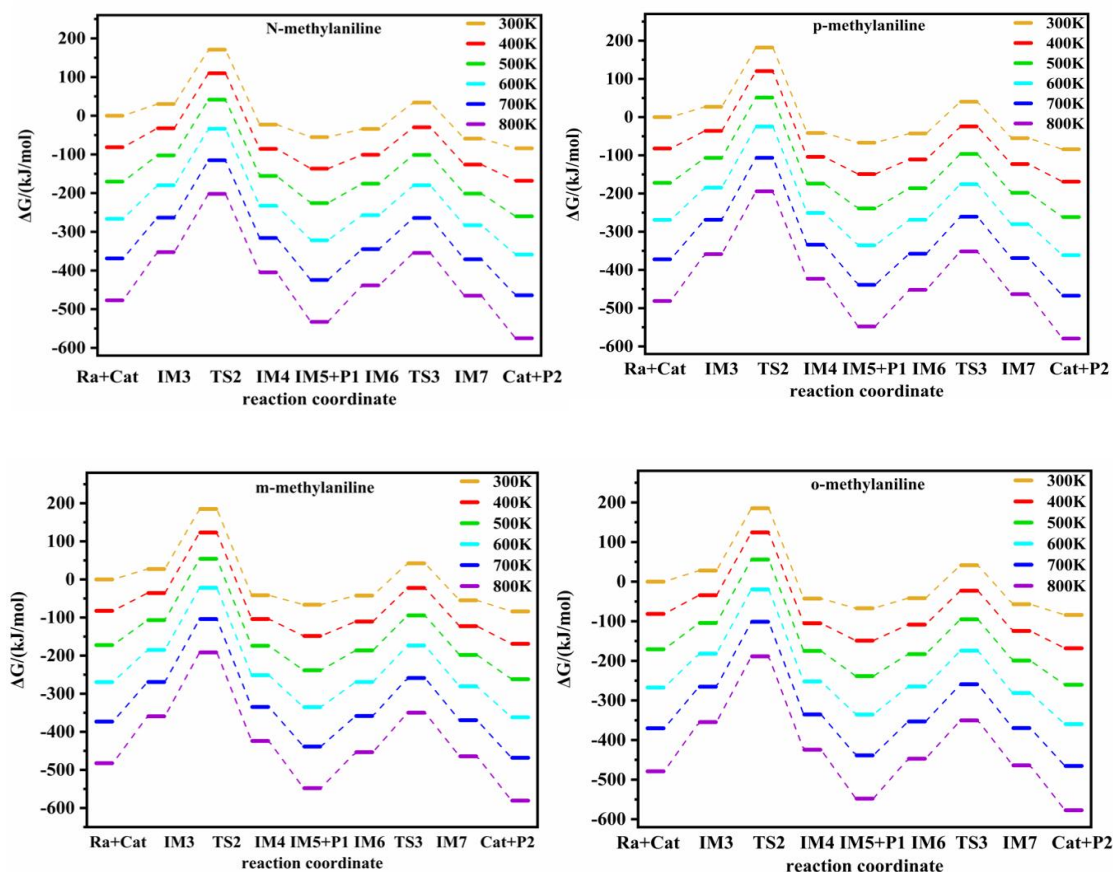

Figure S1. Gibbs free energy change at 300 - 800 K during the reaction of  $\text{Si}_2\text{Cl}_6$  with HCl Catalyzed by amine catalysts (methylamine, ethylamine, propylamine, dimethylamine, aniline, diphenylamine, N-methyl aniline, p-methyl aniline, m-methyl aniline, o-methyl aniline).

Table S2. Gibbs free energy ( hartree ) and relative free energy ( Grel ,kJ/mol ) at each step of the reaction catalyzed by an amine catalyst.

| Species | ammonia      |        | methylamine  |        | ethylamine   |        | propylamine  |        |
|---------|--------------|--------|--------------|--------|--------------|--------|--------------|--------|
|         | G            | Grel   | G            | Grel   | G            | Grel   | G            | Grel   |
| Ra+Cat  | -3397.152681 | 0.00   | -3436.425768 | 0.00   | -3475.715741 | 0.00   | -3515.002893 | 0.00   |
| IM3     | -3397.146687 | 15.74  | -3436.414918 | 28.49  | -3475.706025 | 25.51  | -3514.994151 | 22.95  |
| TS2     | -3397.086265 | 174.38 | -3436.367802 | 152.19 | -3475.661848 | 141.50 | -3514.949987 | 138.90 |
| IM4     | -3397.176178 | -61.69 | -3436.447082 | -55.96 | -3475.736410 | -54.27 | -3515.025695 | -59.87 |
| IM5+P1  | -3397.180823 | -73.89 | -3436.454978 | -76.69 | -3475.745727 | -78.73 | -3515.033356 | -79.98 |
| IM6     | -2187.104478 | -58.45 | -2226.379067 | -62.39 | -2265.669297 | -63.06 | -2304.956616 | -63.50 |
| TS3     | -2187.068426 | 36.21  | -2226.349268 | 15.85  | -2265.641299 | 10.44  | -2304.929070 | 8.82   |
| IM7     | -2187.106229 | -63.04 | -2226.377693 | -58.78 | -2265.668569 | -61.15 | -2304.956146 | -62.27 |
| Cat+P2  | -2187.112262 | -78.88 | -2226.385349 | -78.88 | -2265.675322 | -78.88 | -2304.962474 | -78.88 |

  

| Species | dimethylamine |       | aniline      |       | diphenylamine |       | N-methyl aniline |       |
|---------|---------------|-------|--------------|-------|---------------|-------|------------------|-------|
|         | G             | Grel  | G            | Grel  | G             | Grel  | G                | Grel  |
| Ra+Cat  | -3475.703437  | 0.00  | -3628.106302 | 0.00  | -3859.057866  | 0.00  | -3667.382817     | 0.00  |
| IM3     | -3475.689186  | 37.42 | -3628.098756 | 19.81 | -3859.050332  | 19.78 | -3667.374580     | 21.63 |

|        |              |        |              |        |              |        |              |        |
|--------|--------------|--------|--------------|--------|--------------|--------|--------------|--------|
| TS2    | -3475.651755 | 135.69 | -3628.037869 | 179.67 | -3858.986965 | 186.15 | -3667.320446 | 163.76 |
| IM4    | -3475.722004 | -48.75 | -3628.124819 | -48.62 | -3859.068163 | -27.03 | -3667.396018 | -34.66 |
| IM5+P1 | -3475.730649 | -71.45 | -3628.131304 | -65.64 | -3859.077004 | -50.25 | -3667.404448 | -56.79 |
| IM6    | -2265.655546 | -59.27 | -2418.053113 | -45.36 | -2648.998471 | -29.06 | -2457.326873 | -38.12 |
| TS3    | -2265.631433 | 4.04   | -2418.018994 | 44.22  | -2648.964459 | 60.24  | -2457.299057 | 34.91  |
| IM7    | -2265.655484 | -59.10 | -2418.059008 | -60.83 | -2649.010922 | -61.75 | -2457.337378 | -65.70 |
| Cat+P2 | -2265.663018 | -78.88 | -2418.065883 | -78.88 | -2649.017447 | -78.88 | -2457.342398 | -78.88 |

  

| Species | p-methyl aniline |        | m-methyl aniline |        | o-methyl aniline |        |
|---------|------------------|--------|------------------|--------|------------------|--------|
|         | G                | Grel   | G                | Grel   | G                | Grel   |
| Ra+Cat  | -3667.398198     | 0.00   | -3667.399628     | 0.00   | -3667.397509     | 0.00   |
| IM3     | -3667.390450     | 20.34  | -3667.392163     | 19.60  | -3667.389355     | 21.41  |
| TS2     | -3667.331846     | 174.21 | -3667.332019     | 177.51 | -3667.329329     | 179.01 |
| IM4     | -3667.417198     | -49.88 | -3667.418091     | -48.47 | -3667.417330     | -52.04 |
| IM5+P1  | -3667.423786     | -67.18 | -3667.424985     | -66.57 | -3667.423296     | -67.70 |
| IM6     | -2457.346379     | -48.95 | -2457.347728     | -48.74 | -2457.344425     | -45.63 |
| TS3     | -2457.312280     | 40.57  | -2457.312862     | 42.80  | -2457.311239     | 41.50  |
| IM7     | -2457.350356     | -59.39 | -2457.351792     | -59.41 | -2457.350979     | -62.84 |
| Cat+P2  | -2457.357779     | -78.88 | -2457.359209     | -78.88 | -2457.35709      | -78.88 |

Table S3. the values of reaction rate constants, activation energies (kJ/mol) and pre-exponential factors ( $s^{-1}$ ) in the temperature range of 300 - 800 K.

| Catalyst         | 300K   |                       |                        | 400K   |                       |                       | 500K   |                       |                       |
|------------------|--------|-----------------------|------------------------|--------|-----------------------|-----------------------|--------|-----------------------|-----------------------|
|                  | Ea     | A                     | k                      | Ea     | A                     | k                     | Ea     | A                     | k                     |
| ammonia          | 159.64 | $2.69 \times 10^{12}$ | $4.30 \times 10^{-16}$ | 158.88 | $2.14 \times 10^{12}$ | $3.83 \times 10^{-9}$ | 158.31 | $1.89 \times 10^{12}$ | $5.47 \times 10^{-5}$ |
| methylamine      | 128.45 | $1.80 \times 10^{13}$ | $7.75 \times 10^{-10}$ | 128.42 | $1.52 \times 10^{13}$ | $2.57 \times 10^{-4}$ | 128.39 | $1.33 \times 10^{13}$ | $5.12 \times 10^{-1}$ |
| ethylamine       | 123.96 | $3.60 \times 10^{13}$ | $9.36 \times 10^{-9}$  | 123.96 | $3.00 \times 10^{13}$ | $1.95 \times 10^{-3}$ | 123.93 | $2.60 \times 10^{13}$ | 2.93                  |
| propylamine      | 122.54 | $2.46 \times 10^{13}$ | $1.13 \times 10^{-8}$  | 122.53 | $2.24 \times 10^{13}$ | $2.23 \times 10^{-3}$ | 122.50 | $2.07 \times 10^{13}$ | 3.30                  |
| dimethylamine    | 108.94 | $6.94 \times 10^{13}$ | $7.46 \times 10^{-6}$  | 109.11 | $5.79 \times 10^{13}$ | $3.26 \times 10^{-1}$ | 109.23 | $4.96 \times 10^{13}$ | $1.92 \times 10^2$    |
| aniline          | 157.72 | $2.42 \times 10^{12}$ | $8.34 \times 10^{-16}$ | 157.20 | $2.22 \times 10^{12}$ | $6.55 \times 10^{-9}$ | 156.75 | $2.11 \times 10^{12}$ | $8.87 \times 10^{-5}$ |
| diphenylamine    | 159.49 | $1.07 \times 10^{12}$ | $1.81 \times 10^{-16}$ | 159.06 | $1.11 \times 10^{12}$ | $1.87 \times 10^{-9}$ | 158.70 | $1.16 \times 10^{12}$ | $3.06 \times 10^{-5}$ |
| N-methyl aniline | 136.40 | $1.27 \times 10^{12}$ | $2.25 \times 10^{-12}$ | 136.08 | $1.33 \times 10^{12}$ | $2.24 \times 10^{-6}$ | 135.81 | $1.39 \times 10^{12}$ | $8.99 \times 10^{-3}$ |
| p-methyl aniline | 153.44 | $3.30 \times 10^{12}$ | $6.34 \times 10^{-15}$ | 152.91 | $2.89 \times 10^{12}$ | $3.11 \times 10^{-8}$ | 152.44 | $2.65 \times 10^{12}$ | $3.14 \times 10^{-4}$ |
| m-methyl aniline | 155.31 | $2.52 \times 10^{12}$ | $2.29 \times 10^{-15}$ | 154.89 | $2.29 \times 10^{12}$ | $1.36 \times 10^{-8}$ | 154.49 | $2.15 \times 10^{12}$ | $1.55 \times 10^{-4}$ |
| o-methyl aniline | 155.36 | $2.83 \times 10^{12}$ | $2.51 \times 10^{-15}$ | 154.90 | $2.66 \times 10^{12}$ | $1.57 \times 10^{-8}$ | 154.47 | $2.56 \times 10^{12}$ | $1.87 \times 10^{-4}$ |

  

| Catalyst      | 600K   |                       |                       | 700K   |                       |                    | 800K   |                       |                    |
|---------------|--------|-----------------------|-----------------------|--------|-----------------------|--------------------|--------|-----------------------|--------------------|
|               | Ea     | A                     | k                     | Ea     | A                     | k                  | Ea     | A                     | k                  |
| ammonia       | 157.90 | $1.77 \times 10^{12}$ | $3.18 \times 10^{-2}$ | 157.64 | $1.73 \times 10^{12}$ | 2.98               | 157.48 | $1.72 \times 10^{12}$ | $8.94 \times 10$   |
| methylamine   | 128.38 | $1.20 \times 10^{13}$ | $7.96 \times 10$      | 128.41 | $1.10 \times 10^{13}$ | $2.88 \times 10^3$ | 128.46 | $1.03 \times 10^{13}$ | $4.22 \times 10^4$ |
| ethylamine    | 123.92 | $2.31 \times 10^{13}$ | $3.76 \times 10^2$    | 123.93 | $2.11 \times 10^{13}$ | $1.19 \times 10^4$ | 123.97 | $1.95 \times 10^{13}$ | $1.57 \times 10^5$ |
| propylamine   | 122.48 | $1.94 \times 10^{13}$ | $4.23 \times 10^2$    | 122.47 | $1.85 \times 10^{13}$ | $1.34 \times 10^4$ | 122.49 | $1.78 \times 10^{13}$ | $1.79 \times 10^5$ |
| dimethylamine | 109.34 | $4.36 \times 10^{13}$ | $1.32 \times 10^4$    | 109.44 | $3.91 \times 10^{13}$ | $2.66 \times 10^5$ | 109.56 | $3.56 \times 10^{13}$ | $2.50 \times 10^6$ |
| aniline       | 156.40 | $2.07 \times 10^{12}$ | $5.01 \times 10^{-2}$ | 156.15 | $2.08 \times 10^{12}$ | 4.63               | 155.97 | $2.11 \times 10^{12}$ | $1.38 \times 10^2$ |
| diphenylamine | 158.41 | $1.23 \times 10^{12}$ | $1.99 \times 10^{-2}$ | 158.21 | $1.31 \times 10^{12}$ | 2.05               | 158.07 | $1.40 \times 10^{12}$ | $6.68 \times 10$   |

---

|                  |        |                       |                       |        |                       |                    |        |                       |                    |
|------------------|--------|-----------------------|-----------------------|--------|-----------------------|--------------------|--------|-----------------------|--------------------|
| N-methyl aniline | 135.59 | $1.46 \times 10^{12}$ | 2.28                  | 135.43 | $1.54 \times 10^{12}$ | $1.20 \times 10^2$ | 135.32 | $1.62 \times 10^{12}$ | $2.37 \times 10^3$ |
| p-methyl aniline | 152.07 | $2.53 \times 10^{12}$ | $1.46 \times 10^{-1}$ | 151.80 | $2.47 \times 10^{12}$ | $1.16 \times 10$   | 151.61 | $2.45 \times 10^{12}$ | $3.09 \times 10^2$ |
| m-methyl aniline | 154.18 | $2.07 \times 10^{12}$ | $7.81 \times 10^{-2}$ | 153.95 | $2.04 \times 10^{12}$ | 6.62               | 153.80 | $2.04 \times 10^{12}$ | $1.85 \times 10^2$ |
| o-methyl aniline | 154.12 | $2.53 \times 10^{12}$ | $9.68 \times 10^{-2}$ | 153.87 | $2.55 \times 10^{12}$ | 8.40               | 153.70 | $2.60 \times 10^{12}$ | $2.40 \times 10^2$ |

---

## References

1. Y. S. Ezhov, Calculation of the thermodynamic properties of silane and disilane derivatives and modeling of the thermolysis process, *Russian Journal of Physical Chemistry A, Focus on Chemistry*, 2008, **82**, 487-489.
2. M. Binnewies and E. Milke, *Thermochemical data of elements and compounds*, Wiley Online Library, 2002.
3. I. Barin, *Thermodynamical data of pure substances, Part I and II*, VCH, 1993.
4. B. Landolt and R. Börnstein, *Thermodynamic properties of inorganic material, Scientific Group Thermodata Europe (SGTE)*. Berlin-Heidelberg: Springer-Verlag, 1999.
